# Supplementary material for: Single nucleus sequencing reveals evidence of inter-nucleus recombination in arbuscular mycorrhizal fungi
Source: eLife. 2018 Dec 5;7:e39813. doi: 10.7554/eLife.39813 (PMC6281316; doi:10.7554/eLife.39813)
Supplement: Supplementary file 4. — Based on the first 100 scaffolds. [file elife-39813-supp4.xlsx]

## Sheet: Sheet1
Single nucleus sequencing reveals evidence of inter-nucleus recombination in arbuscular mycorrhizal fungi. Eric C.H. Chen, Stephanie Mathieu, Anne Hoffrichter, Kinga Sedzielewska-Toro, Max Peart, Adrian Pelin, Steve Ndikumana, Jeanne Ropars, Steven Dreissig, Jörg Fuchs, Andreas Brachmann, and Nicolas Corradi
Supplemental file 4. Number of SNP positions in light and strict filtering based on first 100 scaffolds.
	Number of SNPs in the first 100 scaffolds
	Basic/Light filtering	Stringent filtering	Percent Reduction
R. irregularis A1	15735	48	0.996949
R. irregularis A4	21464	2362	0.889955
R. irregularis A5	13911	2483	0.821508
R. irregularis C2	12057	57	0.995272
R. irregularis SL1	9636	1236	0.871731
R. Diaphanus	6031	9	0.998508
R. Cerebriforme	17970	131	0.99271
Average			0.938091
